# Supplementary material
Source: PubMed Central journal article supplement (PMC2323505)
Supplement: pgen.0040023.st003.pdf [file pgen.0040023.st003.pdf]

**Table S3a. Enrichment of COG functional categories in top 10% fast- or slow-evolving sets of genes**

| <u>Species</u>                       | <u>COG function</u>        | <u>Enrichment</u> | <u>Bonferonni-corrected P-value</u> |
|--------------------------------------|----------------------------|-------------------|-------------------------------------|
| <i>Haemophilus ducreyi</i>           | Ribosome & Translation     | slow              | <0.0001                             |
| <i>C. Blochmannia floridanus</i>     | Ribosome & Translation     | fast              | <0.0001                             |
| <i>Xylella fastidiosa</i>            | Ribosome & Translation     | fast              | <0.0001                             |
| <i>Escherichia coli K12</i>          | Motility & Secretion       | fast              | <0.001                              |
| <i>Pasteurella multocida</i>         | Ribosome & Translation     | slow              | <0.001                              |
| <i>Photorhabdus luminescens</i>      | Motility & Secretion       | fast              | <0.001                              |
| <i>Mannheimia succiniciproducens</i> | Ribosome & Translation     | slow              | <0.001                              |
| <i>Photorhabdus luminescens</i>      | Ribosome & Translation     | slow              | <0.001                              |
| <i>Vibrio parahaemolyticus</i>       | Amino acid metabolism      | slow              | <0.01                               |
| <i>Haemophilus influenzae</i>        | Ribosome & Translation     | slow              | <0.01                               |
| <i>Buchnera aphidicola str. APS</i>  | Ion transport & metabolism | slow              | <0.01                               |
| <i>Wigglesworthia glossinidia</i>    | Coenzyme metabolism        | slow              | <0.01                               |
| <i>Haemophilus ducreyi</i>           | Cell Division              | fast              | <0.05                               |
| <i>Vibrio vulnificus</i>             | Nucleic acid metabolism    | slow              | <0.05                               |
| <i>Yersinia pestis</i>               | Motility & Secretion       | fast              | <0.05                               |
| <i>Idiomarina loihiensis</i>         | Carbohydrate metabolism    | fast              | <0.05                               |
| <i>Xylella fastidiosa</i>            | Energy production          | slow              | <0.05                               |
| <i>Idiomarina loihiensis</i>         | Amino acid metabolism      | fast              | <0.05                               |
| <i>Photobacterium profundum</i>      | Cell Division              | fast              | <0.05                               |

**Table S3a Legend:**

Fast and slow-evolving sets of genes were defined as those with the highest or lowest 10% values of  $v$  in a genome, with a Z-score threshold of 1.0. A hypergeometric test was performed to test whether each functional category was enriched in the fast or slow set, relative to the expected fraction of that category in the whole genome. P-values are Bonferonni-corrected for tests on 16 COG categories.

**Table S3b. List of fast-evolving flagellar genes in 3 species of Enterobacteria**

| <u>COG</u> | <u>Name</u> | <u><i>E. coli K12</i></u> | <u><i>P. luminescens</i></u> | <u><i>Y. pestis</i></u> | <u>Description</u>                                                               |
|------------|-------------|---------------------------|------------------------------|-------------------------|----------------------------------------------------------------------------------|
| 1377       | FliB        | *                         | *                            |                         | Flagellar biosynthesis pathway                                                   |
| 1684       | FliR        | *                         | *                            |                         | Flagellar biosynthesis pathway                                                   |
| 3418       | FlgN        | *                         | *                            | *                       | Flagellar biosynthesis/type III secretory pathway chaperone                      |
| 4787       | FlgF        | *                         | *                            |                         | Flagellar basal body rod protein                                                 |
| 1261       | FlgA        | *                         | *                            |                         | Flagellar basal body P-ring biosynthesis protein                                 |
| 3190       | FliO        | *                         |                              |                         | Flagellar biosynthesis protein                                                   |
| 4967       | PilV        | *                         |                              | *                       | Tfp pilus assembly protein                                                       |
| 1815       | FlgB        | *                         |                              |                         | Flagellar basal body protein                                                     |
| 1345       | FliD        | *                         |                              |                         | Flagellar capping protein                                                        |
| 1516       | FliS        | *                         | *                            |                         | Flagellin-specific chaperone                                                     |
| 4786       | FlgG        |                           | *                            |                         | Flagellar basal body rod protein                                                 |
| 1706       | FlgI        |                           | *                            |                         | Flagellar basal body P-ring protein                                              |
| 1677       | FliE        |                           | *                            |                         | Flagellar hook basal body protein                                                |
| 2805       | PilT        |                           | *                            | *                       | Tfp pilus assembly protein, pilus retraction ATPase                              |
| 4969       | PilA        |                           | *                            | *                       | Tfp pilus assembly protein, major pilin                                          |
| 1989       | PuIO        |                           |                              | *                       | Type II secretory pathway, prepilin signal peptidase PuIO and related peptidases |

**Table S3b Legend:**

The COG function "Motility & Secretion" is enriched in the fast-evolving set of genes in 3 species of Enterobacteria: *Escherichia coli K12*, *Photorhabdus luminescens*, and *Yersinia pestis*. The genes responsible for this trend are all involved in flagellar functions. Different genes are fast-evolving in each species: these are denoted by asterices in the relevant column.
