# Supplementary material
Source: PubMed Central journal article supplement (PMC2323505)
Supplement: pgen.0040023.st004.pdf [file pgen.0040023.st004.pdf]

**Supplementary Table 4. Evidence for site-specific changes in dN/dS in *Idiomarina* genes.**

| Pathway                    | Gene        | COG  | Test A: Selection on <i>Idiomarina</i> |                                                         | Test B: Site-specific selection on <i>Idiomarina</i> |                                                                                |
|----------------------------|-------------|------|----------------------------------------|---------------------------------------------------------|------------------------------------------------------|--------------------------------------------------------------------------------|
|                            |             |      | Different dN/dS in <i>Idiomarina</i> ? | dN/dS in <i>Idiomarina</i> (relative to other lineages) | Sites with higher dN/dS in <i>Idiomarina</i> ?       | Proportion of sites with higher dN/dS in <i>Idiomarina</i> (dN/dS > 1 in bold) |
| Glycolysis                 | <i>Pgi</i>  | 166  | yes*                                   | 0.0066 (lower)                                          | yes***                                               | 0.40                                                                           |
|                            | <i>Fbp</i>  | 158  | yes**                                  | 0.0022 (lower)                                          | yes***                                               | 0.18                                                                           |
|                            | <i>Eno</i>  | 148  | yes***                                 | 0.0017 (lower)                                          | yes***                                               | <b>0.08</b>                                                                    |
|                            | <i>TpiA</i> | 149  | yes*                                   | 0.0056 (lower)                                          | yes***                                               | <b>0.26</b>                                                                    |
|                            | <i>Pfk</i>  | 205  | yes*                                   | 0.0038 (lower)                                          | yes***                                               | 0.30                                                                           |
|                            | <i>NagE</i> | 2190 | no                                     | 0.0185                                                  | yes***                                               | 0.75                                                                           |
| Phenylalanine biosynthesis | <i>AroQ</i> | 757  | yes*                                   | 0.0028 (lower)                                          | yes*                                                 | 0.07                                                                           |
|                            | <i>AroB</i> | 337  | no                                     | 0.0044                                                  | yes***                                               | 0.23                                                                           |
|                            | <i>AroE</i> | 169  | no                                     | 0.0055                                                  | yes***                                               | <b>0.16</b>                                                                    |
|                            | <i>PheA</i> | 77   | no                                     | 0.0115                                                  | yes**                                                | 0.45                                                                           |

Likelihood ratio test: \* P < 0.05, \*\* P < 0.005, \*\*\* P < 0.00001

To support the high values of  $\nu$  observed in glycolysis and phenylalanine biosynthesis in *Idiomarina*, we analyzed these genes in PAML under 5 different evolutionary models: (1) No branch variation (single value of dN/dS for the whole tree); no site variation, (2) Different dN/dS allowed in the *Idiomarina* branch (two values of dN/dS in the tree); no site variation, (3) No branch variation; variable selective pressure among sites allowed (3 categories of sites, each allowed a different dN/dS), (4) Different dN/dS allowed in *Idiomarina*; variable selective pressure among sites allowed (3 categories of sites for *Idiomarina* and 3 for the rest of the tree, each allowed a different dN/dS), and (5) Same as Model 4, but fixing dN/dS not to exceed 1. In Test A, Model 2 is compared with Model 1 in a likelihood ratio test (compare  $2(L_2 - L_1)$  to  $\chi^2$  distribution with degrees of freedom = # parameters in Model 2 – Model 1). In effect, this tests whether *Idiomarina* has a different dN/dS, averaged over all sites in the gene, than other lineages. It should be noted that for all genes in the table above, dS is saturated (> 50 substitutions per site), perhaps explaining the relatively low average values of dN/dS. In Test B, Model 4 is compared to Model 3 in a likelihood ratio test (compare  $2(L_4 - L_3)$  to  $\chi^2$  distribution with degrees of freedom = # parameters in Model 4 – Model 3). For all 10 genes, this test supports sites under different selection in *Idiomarina*. In all cases, there is at least one site category with higher dN/dS in *Idiomarina* than other lineages. We performed a final test to determine whether there were some sites in *Idiomarina* with dN/dS > 1. In this test, we compared Model 4 to Model 5 in a likelihood ratio test (compare  $2(L_4 - L_5)$  to  $\chi^2$  distribution with degrees of freedom = # parameters in Model 4 – Model 5). For genes with significant evidence ( $P < 0.05$ ) for sites with dN/dS > 1, the proportion of sites with elevated dN/dS in *Idiomarina* (far right column) is shown in bold.
