# Supplementary material
Source: PubMed Central journal article supplement (PMC2323505)
Supplement: pgen.0040023.st005.pdf [file pgen.0040023.st005.pdf]

**Supplementary Table 5. Genes predicted under selection in *E. coli* by selective signatures and the MK test**

| COG  | $\log_2 v$ | $\log_2 FI$ | dN/dS | Func | Description |    |                                                                                                          |
|------|------------|-------------|-------|------|-------------|----|----------------------------------------------------------------------------------------------------------|
| 112  | 2.13       | **          | 2.47  | *    | 0.12        | E  | serine hydroxymethyltransferase                                                                          |
| 118  | 2.02       | **          | 0.82  |      | 0.07        | E  | imidazole glycerol phosphate synthase subunit HisH                                                       |
| 150  | 1.96       | **          | 0.69  |      | 0.03        | F  | phosphoribosylaminoimidazole synthetase                                                                  |
| 2973 | 1.86       | *           | 0.41  |      | 0.00        | K  | Trp operon repressor                                                                                     |
| 157  | 1.86       | **          | 0.68  |      | 0.02        | H  | nicotinate-nucleotide pyrophosphorylase                                                                  |
| 2980 | 1.73       | **          | 0.43  |      | 0.07        | M  | minor lipoprotein                                                                                        |
| 704  | 1.54       | *           | 0.84  |      | 3.21        | P  | negative regulator of PhoR/PhoB two-component regulator                                                  |
| 357  | 1.51       | **          | 0.61  |      | 0.02        | M  | glucose-inhibited division protein B                                                                     |
| 99   | 1.48       | *           | 0.74  |      | 0.24        | J  | 30S ribosomal protein S13                                                                                |
| 649  | 1.48       | *           | 1.87  | *    | 0.02        | C  | NADH:ubiquinone oxidoreductase, chain C,D                                                                |
| 196  | 1.33       | **          | 0.54  |      | 0.03        | H  | hypothetical protein                                                                                     |
| 414  | 1.30       | *           | 2.02  | *    | 0.04        | H  | pantoate--beta-alanine ligase                                                                            |
| 2109 | 1.28       | *           | 0.50  |      | 0.00        | H  | cob(I)yrinic acid a,c-diamide adenosyltransferase                                                        |
| 3123 | 1.28       | *           | 0.94  |      | 0.02        | S  | hypothetical protein                                                                                     |
| 1214 | 1.27       | **          | 0.94  |      | 0.05        | O  | predicted peptidase                                                                                      |
| 3159 | 1.21       | *           | 0.90  |      | 0.09        | S  | hypothetical protein                                                                                     |
| 850  | 1.19       | **          | 0.37  |      | 0.06        | D  | septum formation inhibitor                                                                               |
| 221  | 1.16       |             | 1.03  |      | 0.09        | C  | inorganic pyrophosphatase                                                                                |
| 2861 | 1.15       | *           | 0.85  |      | 0.63        | S  | orf, hypothetical protein                                                                                |
| 1983 | 1.12       | *           | 0.93  |      | 0.06        | KT | DNA-binding transcriptional activator                                                                    |
| 529  | 1.11       |             | 0.55  |      | 0.05        | P  | adenylylsulfate kinase                                                                                   |
| 149  | 1.07       | *           | 2.08  |      | 0.08        | G  | triosephosphate isomerase                                                                                |
| 205  | 1.05       | *           | 0.89  |      | 0.03        | G  | 6-phosphofructokinase                                                                                    |
| 3076 | 1.03       |             | 0.30  |      | 0.02        | S  | hypothetical protein                                                                                     |
| 229  | 0.97       | *           | 0.67  |      | 0.02        | O  | methionine sulfoxide reductase B                                                                         |
| 540  | 0.96       | *           | 1.68  |      | 0.02        | F  | aspartate carbamoyltransferase catalytic subunit                                                         |
| 1005 | 0.95       |             | 1.82  | *    | 0.16        | C  | NADH dehydrogenase subunit H                                                                             |
| 751  | 0.88       | *           | 2.09  | *    | 0.05        | J  | glycyl-tRNA synthetase subunit beta                                                                      |
| 17   | 0.86       |             | 1.00  |      | 0.05        | J  | asparaginyl-tRNA synthetase                                                                              |
| 481  | 0.85       |             | 0.94  |      | 0.02        | M  | GTP-binding protein LepA                                                                                 |
| 1666 | 0.84       |             | 2.52  | *    | 0.07        | S  | orf, hypothetical protein                                                                                |
| 344  | 0.82       | *           | 1.74  |      | 0.08        | S  | hypothetical protein                                                                                     |
| 682  | 0.80       | *           | 1.93  | *    | 2.50        | M  | prolipoprotein diacylglycerol transferase                                                                |
| 2377 | 0.80       | **          | 0.37  |      | 0.01        | O  | anhydro-N-acetylmuramic acid kinase                                                                      |
| 554  | 0.74       |             | 0.27  |      | 0.03        | C  | glycerol kinase                                                                                          |
| 151  | 0.73       |             | 0.29  |      | 4.33        | F  | phosphoribosylamine--glycine ligase                                                                      |
| 233  | 0.73       |             | 0.95  |      | 0.07        | J  | ribosome releasing factor                                                                                |
| 249  | 0.69       | *           | 1.51  | *    | 0.02        | L  | DNA mismatch repair protein                                                                              |
| 66   | 0.69       |             | 0.32  |      | 0.08        | E  | isopropylmalate isomerase small subunit                                                                  |
| 212  | 0.68       | *           | 0.61  |      | 0.01        | H  | putative ligase                                                                                          |
| 1207 | 0.64       | *           | 0.91  |      | 0.06        | M  | bifunctional N-acetylglucosamine-1-phosphate uridyltransferase/glucosamine-1-phosphate acetyltransferase |
| 2908 | 0.64       | *           | 0.44  |      | 0.06        | S  | UDP-2,3-diacylglucosamine hydrolase                                                                      |
| 165  | 0.63       |             | 0.37  |      | 0.09        | E  | argininosuccinate lyase                                                                                  |
| 468  | 0.63       |             | 0.67  |      | 0.01        | L  | recombinase A                                                                                            |
| 3004 | 0.62       |             | 0.66  |      | 0.00        | P  | pH-dependent sodium/proton antiporter                                                                    |
| 2360 | 0.62       | *           | 0.56  |      | 0.04        | O  | leucyl/phenylalanyl-tRNA--protein transferase                                                            |
| 1485 | 0.60       | *           | 0.37  |      | 0.04        | R  | conserved protein with nucleoside triphosphate hydrolase domain                                          |
| 106  | 0.58       |             | 0.32  |      | 0.02        | E  | N-(5'-phospho-L-ribosyl-formimino)-5-amino-1-(5'-phosphoribosyl)-4-imidazolecarboxamide isomerase        |
| 323  | 0.58       | *           | 0.60  |      | 0.02        | L  | DNA mismatch repair protein                                                                              |
| 418  | 0.58       | *           | 0.30  |      | 0.02        | F  | dihydroorotase                                                                                           |
| 629  | 0.56       |             | 1.41  |      | 0.06        | L  | single-strand DNA-binding protein                                                                        |

|      |       |    |       |      |      |                                                              |                                                                             |
|------|-------|----|-------|------|------|--------------------------------------------------------------|-----------------------------------------------------------------------------|
| 2968 | 0.52  |    | 1.34  | 0.02 | S    | hypothetical protein                                         |                                                                             |
| 519  | -0.51 | *  | -1.10 | 0.01 | F    | bifunctional GMP synthase/glutamine amidotransferase protein |                                                                             |
| 2917 | -0.52 |    | -1.13 | 0.01 | D    | intracellular septation protein A                            |                                                                             |
| 2925 | -0.52 | *  | -1.45 | *    | 0.01 | L                                                            | exonuclease I                                                               |
| 262  | -0.57 | *  | -0.91 | 0.77 | H    | dihydrofolate reductase                                      |                                                                             |
| 1188 | -0.59 |    | -1.46 | 2.06 | J    | ribosome-associated heat shock protein Hsp15                 |                                                                             |
| 275  | -0.65 | *  | -0.98 | 0.01 | M    | S-adenosyl-methyltransferase                                 |                                                                             |
| 1314 | -0.71 | *  | -0.87 | 0.09 | U    | protein-export membrane protein                              |                                                                             |
| 4121 | -0.73 | *  | -0.76 | *    | 0.08 | S                                                            | putative peptidase                                                          |
| 324  | -0.74 |    | -1.90 | *    | 0.05 | J                                                            | tRNA delta(2)-isopentenylpyrophosphate transferase                          |
| 2976 | -0.76 | *  | -1.58 |      | 0.04 | S                                                            | hypothetical protein                                                        |
| 93   | -0.81 |    | -2.32 |      | 0.15 | J                                                            | 50S ribosomal protein L14                                                   |
| 1212 | -0.83 | *  | -1.61 | *    | 0.00 | M                                                            | 3-deoxy-manno-octulosonate cytidyltransferase                               |
| 777  | -0.99 | *  | -2.35 | *    | 0.05 | I                                                            | acetyl-CoA carboxylase subunit beta                                         |
| 774  | -1.04 | *  | -1.26 |      | 0.04 | M                                                            | UDP-3-O-[3-hydroxymyristoyl] N-acetylglucosamine deacetylase                |
| 5633 | -1.05 | *  | -2.65 | *    | 0.08 | R                                                            | hypothetical protein                                                        |
| 2190 | -1.11 | *  | -0.99 |      | 0.03 | G                                                            | glucose-specific PTS system enzyme IIA component                            |
| 4657 | -1.13 | *  | -2.93 | *    | 0.03 | C                                                            | Na(+)-translocating NADH-quinone reductase subunit E                        |
| 360  | -1.15 | *  | -3.00 | *    | 0.06 | J                                                            | 30S ribosomal protein S6                                                    |
| 563  | -1.25 | *  | -0.85 |      | 0.10 | F                                                            | adenylate kinase                                                            |
| 466  | -1.28 | *  | -3.55 | *    | 0.01 | O                                                            | DNA-binding ATP-dependent protease La                                       |
| 3151 | -1.37 | *  | -2.46 |      | 0.02 | S                                                            | predicted dehydrogenase                                                     |
| 4785 | -1.37 | ** | -0.99 |      | 0.08 | R                                                            | hypothetical protein                                                        |
| 101  | -1.41 | *  | -1.14 |      | 1.40 | J                                                            | tRNA pseudouridine synthase A                                               |
| 821  | -1.50 | *  | -0.81 |      | 0.01 | I                                                            | 4-hydroxy-3-methylbut-2-en-1-yl diphosphate synthase                        |
| 2983 | -1.52 | *  | -1.84 | *    | 0.00 | S                                                            | orf, hypothetical protein                                                   |
| 509  | -1.58 | *  | -2.62 | *    | 0.01 | E                                                            | glycine cleavage system protein H                                           |
| 287  | -1.58 | *  | -0.88 |      | 1.62 | E                                                            | fused chorismate mutase T/prephenate dehydrogenase                          |
| 788  | -1.63 | *  | -1.34 |      | 1.28 | F                                                            | formyltetrahydrofolate deformylase                                          |
| 634  | -1.69 | *  | -1.68 |      | 0.02 | F                                                            | hypoxanthine phosphoribosyltransferase                                      |
| 283  | -1.69 | *  | -1.75 |      | 0.01 | F                                                            | cytidylate kinase                                                           |
| 131  | -1.75 | *  | -1.71 | *    | 0.02 | E                                                            | imidazoleglycerolphosphate dehydratase and histidinol-phosphate phosphatase |
| 452  | -2.01 | *  | -1.05 |      | 0.03 | H                                                            | flavoprotein affecting synthesis of DNA and pantothenate metabolism         |
| 41   | -2.43 | *  | -1.23 |      | 0.04 | F                                                            | phosphoribosylaminoimidazole carboxylase catalytic subunit                  |
| 3317 | -2.51 | *  | -1.52 | *    | 0.03 | M                                                            | lipoprotein-34                                                              |
| 575  | -2.60 | *  | -1.77 | *    | 1.38 | I                                                            | CDP-diglyceride synthetase                                                  |
| 779  | -2.62 | *  | -1.15 |      | 0.03 | S                                                            | orf, hypothetical protein                                                   |
| 539  | -2.71 | *  | -1.32 |      | 0.02 | J                                                            | 30S ribosomal protein S1                                                    |
| 3117 | -2.77 | *  | -1.72 | *    | 0.00 | S                                                            | hypothetical protein                                                        |
| 103  | -2.78 | *  | -1.42 |      | 0.06 | J                                                            | 30S ribosomal protein S9                                                    |
| 55   | -2.86 | *  | -1.16 |      | 0.01 | C                                                            | F0F1 ATP synthase subunit beta                                              |
| 1385 | -2.89 | *  | -1.68 | *    | 1.34 | S                                                            | orf, hypothetical protein                                                   |

**Legend.** Genes are listed only when the MK test and selective signatures agree, using the same criteria as Figure 7 in the main text ( $\log_2 FI > 0.26$  and  $\log_2 v > 0.5$ , or  $\log_2 FI < -0.74$  and  $\log_2 v < -0.5$ ). For  $v$ , \* denotes  $Z$  score  $> 1$ , \*\*  $Z > 2$ . For  $FI$ , \* denotes  $\chi^2 > 3.84$  ( $P < 0.05$  with 1 d.f.).

**COG functional category key:**

|   |                         |   |                                        |
|---|-------------------------|---|----------------------------------------|
| C | Energy Production       | K | Transcription                          |
| D | Cell Division           | L | DNA replication, repair & modification |
| E | Amino Acid Metabolism   | M | Cell Envelope                          |
| F | Nucleic Acid Metabolism | N | Motility & Secretion                   |
| G | Carbohydrate Metabolism | O | Protein Modification & degradation     |
| H | Coenzyme Metabolism     | P | Ion Transport & Metabolism             |
| I | Lipid Metabolism        | Q | Secondary Metabolism                   |
| J | Ribosome & Translation  | R | General Function                       |
| S | Unknown                 | T | Signal Transduction                    |
